# Supplementary material for: Photocatalytic reductive defluorination of perfluorooctanoic acid in water under visible light irradiation: the role of electron donor
Source: Royal Society of Chemistry journal article supplement (doi:10.1039/d0ew00205d), 2020-01-01
Supplement: d0ew00205d1.pdf [file d0ew00205d1.pdf]

## **Supporting Information**

### **Photocatalytic reductive defluorination of perfluorooctanoic acid in water under visible light irradiation: The role of electron donor**

Wanjun Wang, Yu Chen, Guiying Li, Wenquan Gu, Taicheng An\*

*Guangdong Key Laboratory of Environmental Catalysis and Health Risk Control, Guangzhou  
Key Laboratory Environmental Catalysis and Pollution Control, School of Environmental  
Science and Engineering, Institute of Environmental Health and Pollution Control,  
Guangdong University of Technology, Guangzhou 510006, China.*

Corresponding author

---

Tel: +86 20 3932 2298, Fax: +86 20 3932 2298, E-mail: [antc99@gdut.edu.cn](mailto:antc99@gdut.edu.cn) (T.C. An);

Pages: 5

Contents: Environmental details;

Four Figures (Figure S1-S4);

One Table (Table S1)

## 1. Characterization of Materials

Crystallographic structures of the products were examined by X-ray diffractometer (XRD) (Cu K $\alpha$ , D/max-Ultima IV). UV-vis absorption spectra were obtained by UV-3600 Plus spectrophotometer (Shimadzu, Japan). Morphologies and microstructures of the as-prepared materials were observed by scanning electron microscopy (SEM) (SU8220, Hitach, Japan) and transmission electron microscopy (TEM) (FE-HRTEM, Talos F200s, FEI Company). High-angle annular dark field (HAADF) images and Energy dispersive X-ray spectroscopy (EDS) were obtained by scanning TEM (Talos F200s, FEI Company). The X-ray photoelectron spectroscopy (XPS) was used to analyze surface electronic states (Escalab 250Xi, Thermo Fisher Scientific). All binding energies were calibrated using contaminant carbon (C1s = 284.8 eV).

## 2. Photoelectrochemical measurements

Electrochemical impedance spectroscopy (EIS) and photocurrent tests were conducted on an electrochemical workstation (CHI 650E, Shanghai Chenhua Instruments, China) with a standard three-electrode cell, using a Pt plate and a saturated Ag/AgCl electrode as counter electrode and reference electrode, respectively. The working electrodes were prepared on the fluorine doped tin oxide (FTO) glass. The electrolyte used was 0.1 M Na<sub>2</sub>SO<sub>4</sub> aqueous solution. 7 mg catalyst was mixed with 0.25 mL ethanol and 10  $\mu$ L nafion solution by ultrasonication for 30 min. The mixture was loaded on FTO glass and dry at 60 °C under atmospheric air. A 300 W Xe lamp with a 420 nm cut-off filter acted as the light source in the tests.

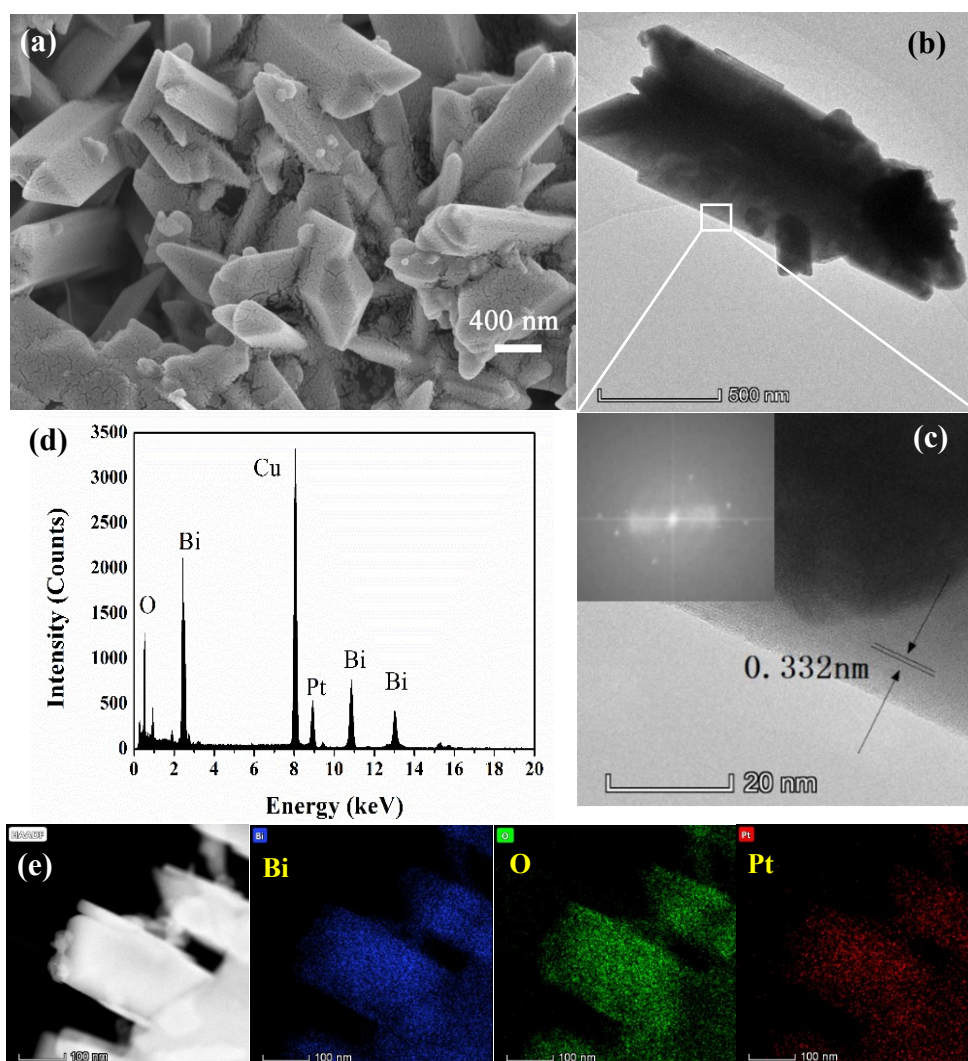

**Fig. S1.** (a) Scanning electron microscopy (SEM) image; (b) Transmission electron microscopy (TEM) image; (c) High-resolution transmission electron microscopy (HR-TEM) image; (d) Energy dispersive spectroscopy (EDS) spectrum; (e) High-angle annular dark field (HAADF) images and elemental mapping of the Pt-Bi<sub>2</sub>O<sub>4</sub>.

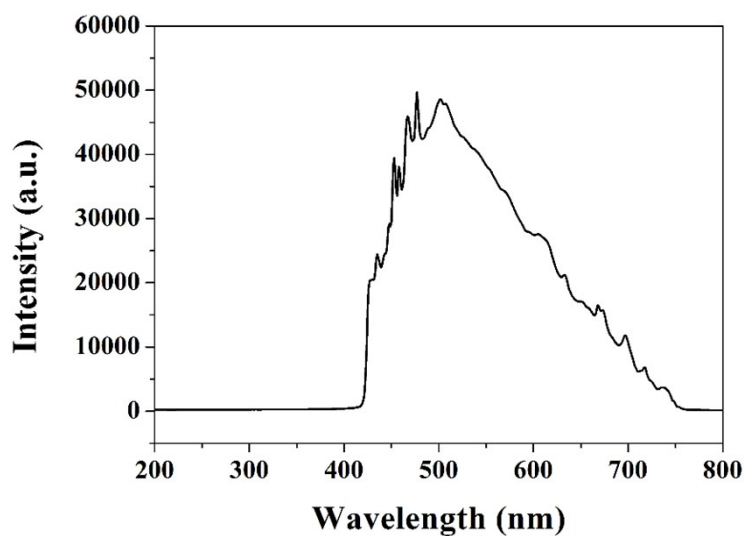

**Fig. S2.** Visible light spectrum used in the photocatalytic treatment of PFOA showing no UV light illumination ( $\lambda > 420$  nm).

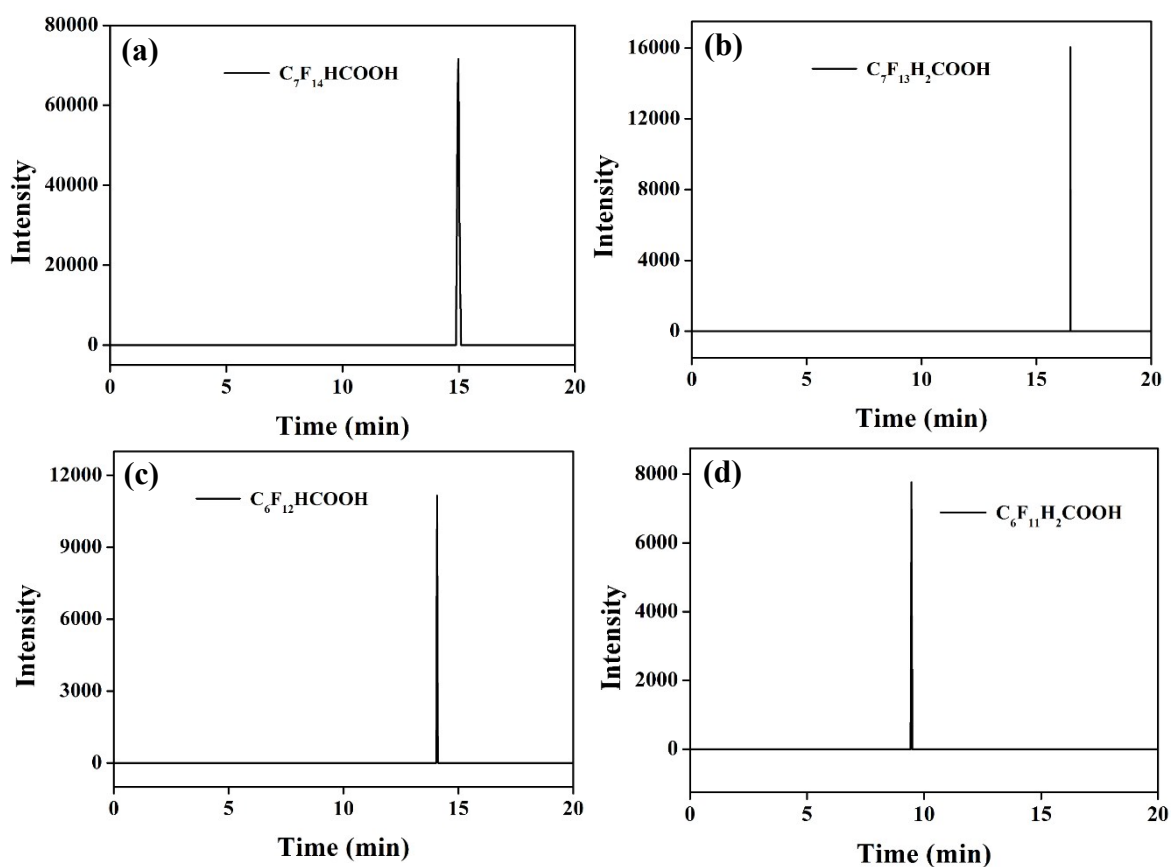

**Fig. S3.** Chromatogram peaks of less fluorinate carboxylic acids intermediates: (a)  $C_7F_{14}HCOOH$ , (b)  $C_7F_{13}H_2COOH$ , (c)  $C_6F_{12}HCOOH$  and (d)  $C_6F_{11}H_2COOH$ .

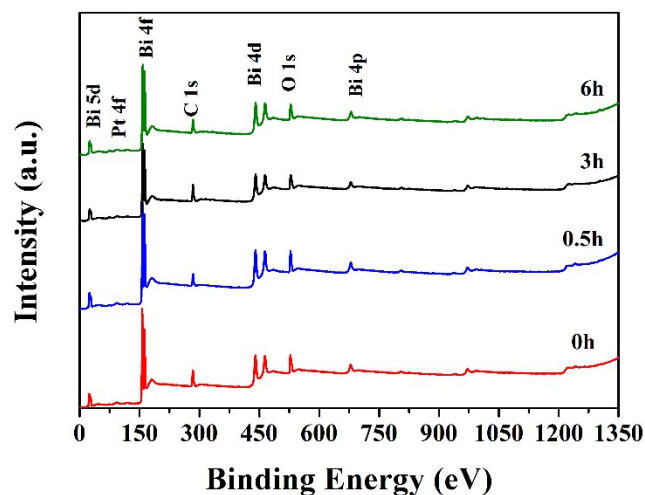

**Fig. S4.** X-ray photoelectron spectroscopy (XPS) survey spectra of Pt-Bi<sub>2</sub>O<sub>4</sub> before and after the PFOA defluorination reaction.

**Table S1.** The mass spectrometer parameters of identified intermediates during photocatalytic reduction of perfluorinated acids (PFCAs).

| Compound                  |      | Abbr. | m/z       |
|---------------------------|------|-------|-----------|
| Pentafluoropropionic acid | (C3) | PFPrA | 162.98239 |
| Perfluorobutyric acid     | (C4) | PFBA  | 212.97920 |
| Perfluoropentanoic acid   | (C5) | PFPeA | 262.97601 |
| Perfluorohexanoic acid    | (C6) | PFHxA | 312.97281 |
| Perfluoroheptanoic acid   | (C7) | PFHpA | 362.96962 |
| Perfluorooctanoic acid    | (C8) | PFOA  | 412.96642 |
